# Supplementary material for: Enhanced removal efficiency of Tetradesmus obliquus for nevirapine removal via co-substrate supplementation: removal mechanisms, relative gene expression and metabolomics
Source: Royal Society of Chemistry journal article supplement (doi:10.1039/d4ew00576g), 2024-01-01
Supplement: d4ew00576g1.pdf [file d4ew00576g1.pdf]

## Enhanced removal efficiency of nevirapine by *Tetradesmus obliquus* via co-substrate supplementation: removal mechanisms and relative gene expression

Karen Reddy<sup>1</sup>, Nirmal Renuka<sup>1,2</sup>, Muneer Ahmad Malla<sup>1</sup>, Brenda Moodley<sup>3</sup>, Faizal Bux<sup>1</sup>  
Sheena Kumari<sup>1\*</sup>,

<sup>1</sup>*Institute for Water and Wastewater Technology, Durban University of Technology, PO Box 1334, Durban, 4000, South Africa*

<sup>2</sup>*Algal Biotechnology Laboratory, Department of Botany, Central University of Punjab, Bathinda, 151401, India*

<sup>3</sup>*School of Chemistry and Physics, College of Agriculture, Engineering and Sciences, University of KwaZulu-Natal, Private Bag X54001, Westville, Durban 4000, South Africa*

\*Professor Sheena Kumari (Email: sheenak1@dut.ac.za)

### Supplementary Data:

**S1.** Oligonucleotide sequences of primers used for relative gene expression studies.

| Primer          | Sequence (5'-3')                                                | Optimized annealing temp. (°C) | Reference |
|-----------------|-----------------------------------------------------------------|--------------------------------|-----------|
| <i>18S rRNA</i> | (F) CGGTCCGCCTATGGTGAGTA<br>(R) CTCCGGTCCTACAGACCAACA           | 62                             | 1         |
| <i>sod1</i>     | (F) ACG GCT CCC TGT CGA TCG A<br>(R) CGC CAC GTC CGG CAG CGC GG | 50                             | 2         |
| <i>gpx1</i>     | (F) CGAAGCCGCACATGGTATAGT<br>(R) TGCTCCAATCACGACCTATTTG         | 50                             | 2         |
| <i>cat2</i>     | (F) GGAGGCTGCAGGAAAACCTGA<br>(R) ATTTCCAGCCTGGGCTACCT           | 50                             | 2         |

F- Forward; R- Reverse, Temp- temperature (°C)

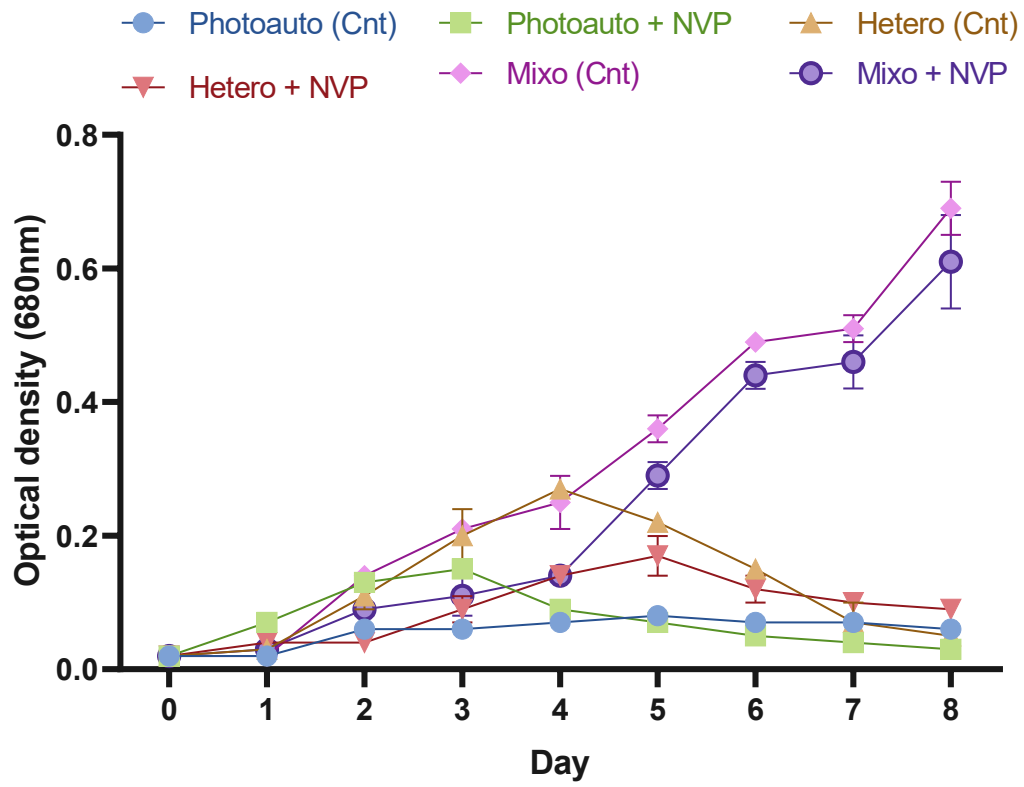

S2. Effect of different cultivation conditions on growth of *Tetradesmus obliquus* in BG-11 medium supplemented with NVP.

**S3.** GC-MS total ion current chromatogram (TIC) of *T. obliquus* biomass obtained from (a) Control (Day 4); (b) Treated (Day 4); (c) Control (Day 8); (d) Treated (Day 8).

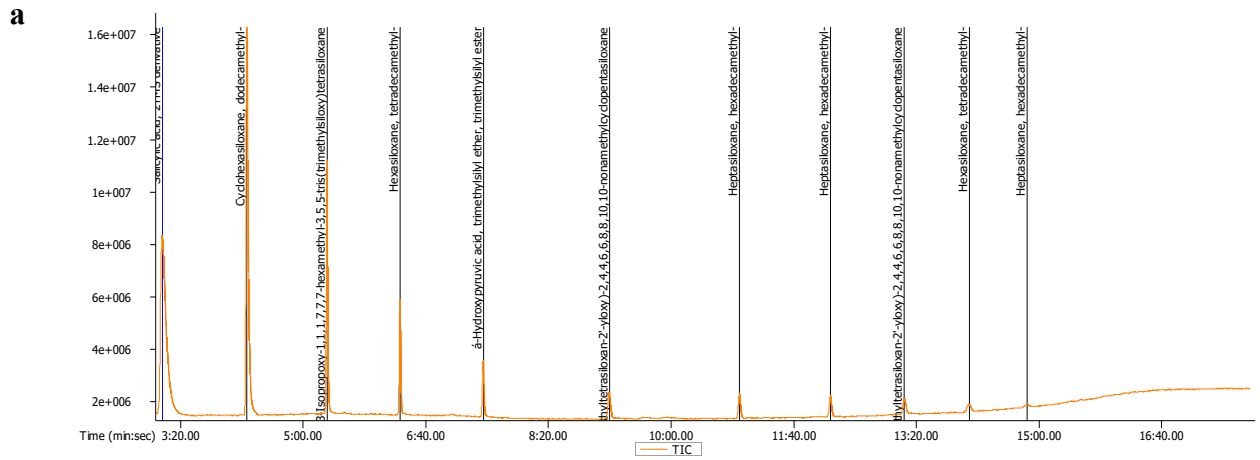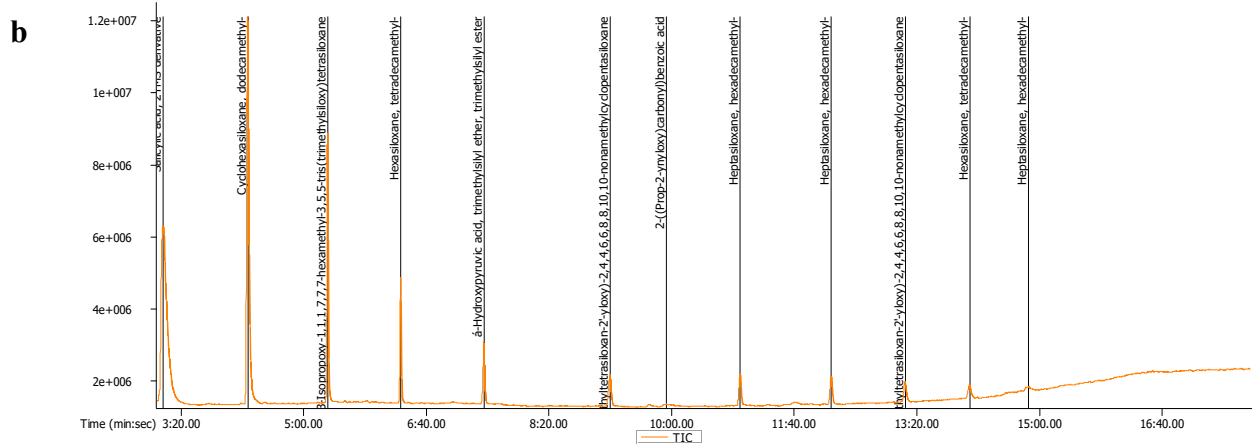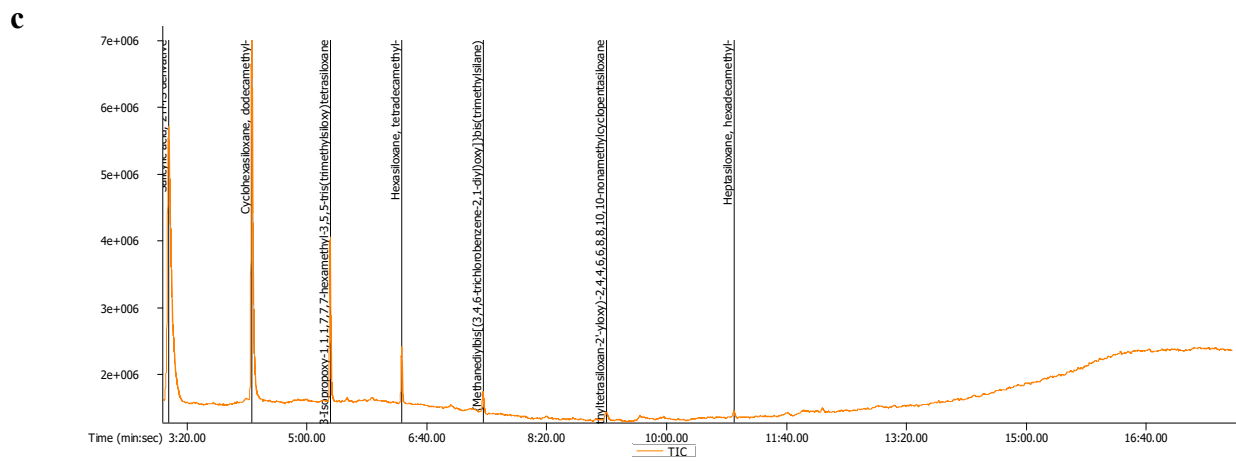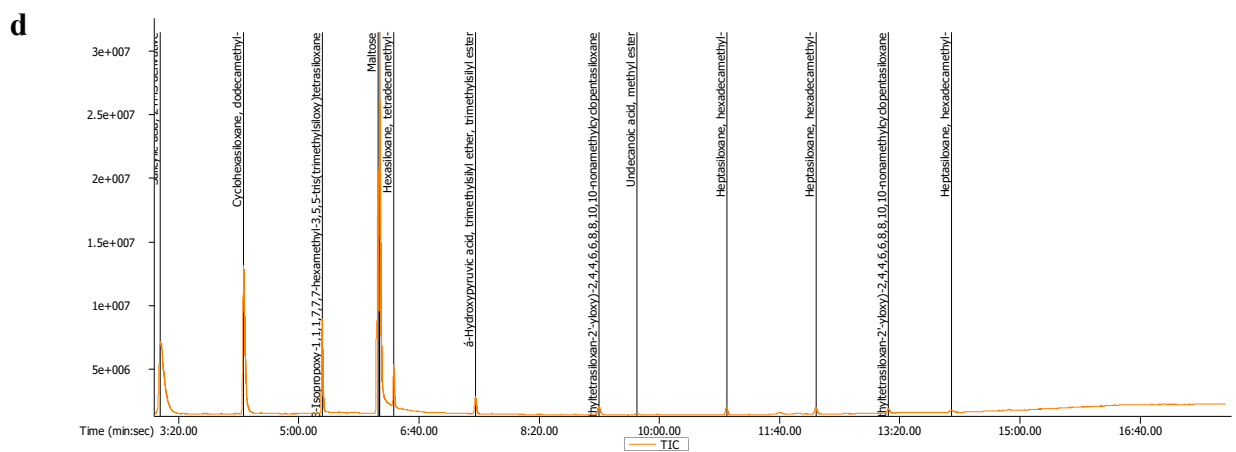

S4. Analysis of metabolic pathways for the 12 annotated metabolites.

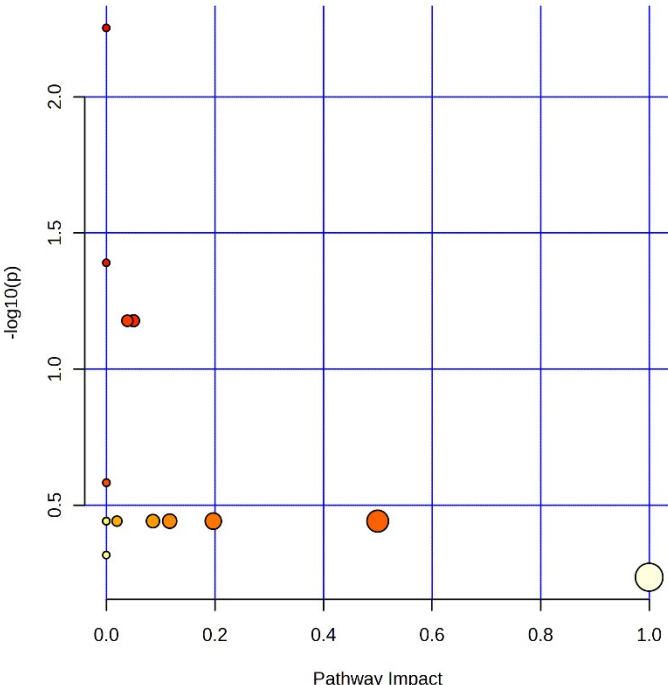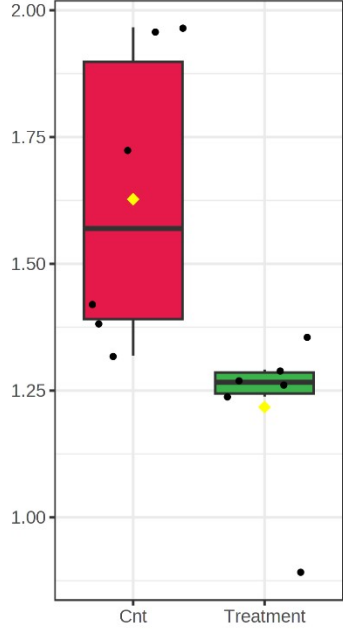

## S5. Receiver operating characteristic curves.

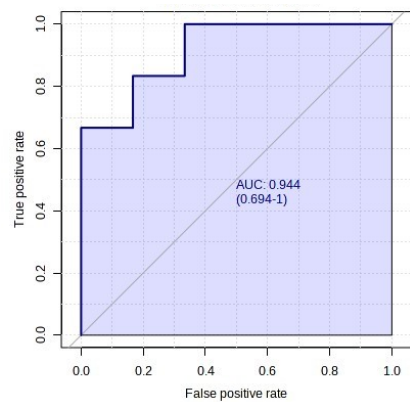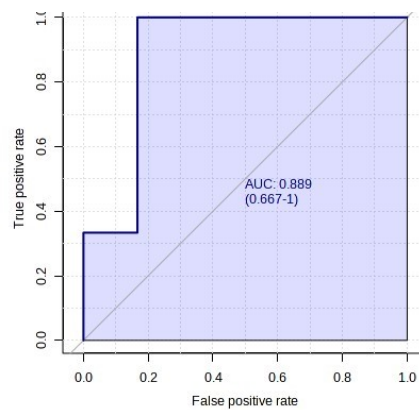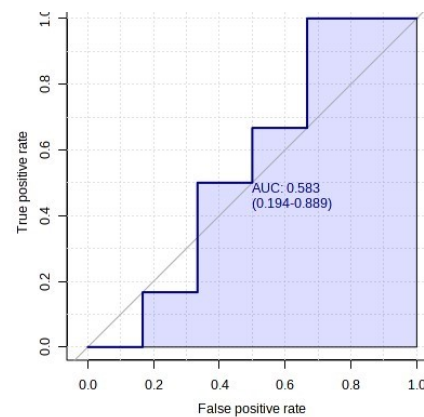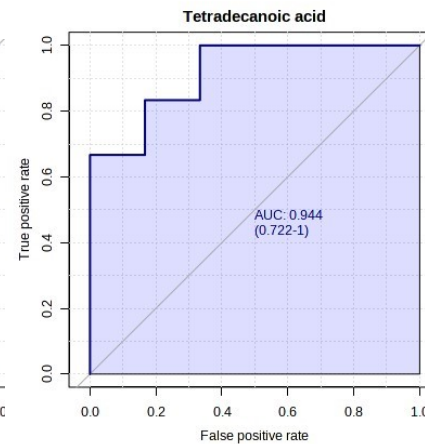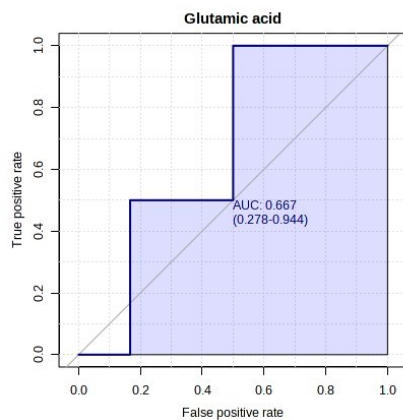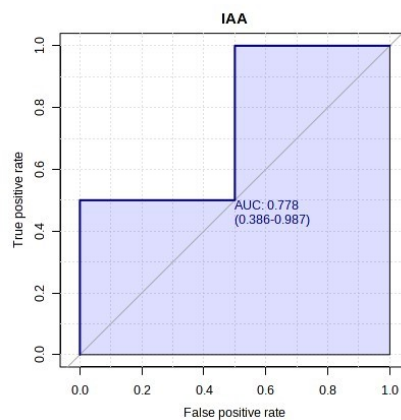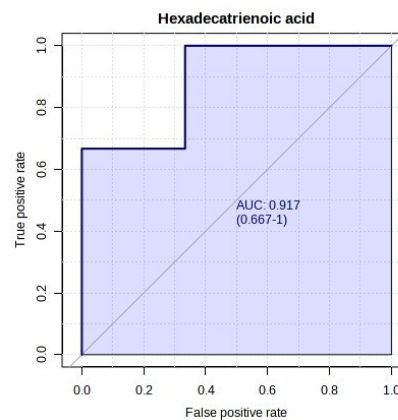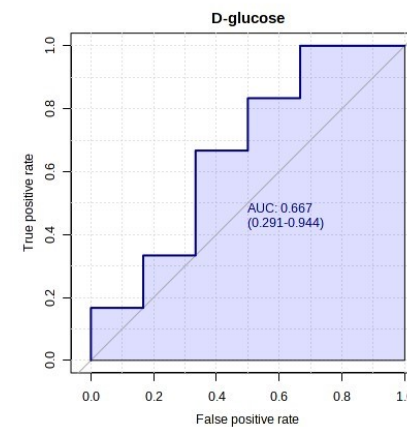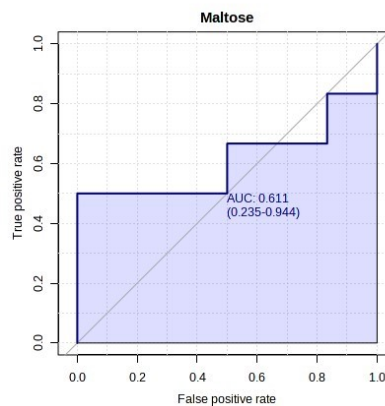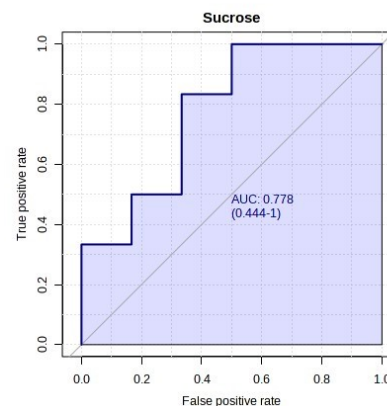

**S6.** Metabolic differences responsible for distinguishing *T. obliquus* exposed to nevirapine from those in the control group

| <b>ChEBI ID</b> | <b>Metabolite</b>     | <b>VIP score</b> | <b><i>f</i>-value</b> | <b><i>p</i>-value</b> | <b>FDR</b> |
|-----------------|-----------------------|------------------|-----------------------|-----------------------|------------|
| CHEBI:28822     | Eicosanoic acid       | 2.065475         | 17.185                | 7.5702E-4             | 0.002271   |
| CHEBI:22340     | Hexadecatrienoic acid | 1.2806           | 17.855                | 6.6419E-4             | 0.002271   |
| CHEBI:77524     | Hexadecadienoic acid  | 1.19305          | 8.149                 | 0.0081                | 0.013617   |
| CHEBI:28875     | Tetradecanoic acid    | 1.005595         | 5.2821                | 0.026                 | 0.035527   |
| CHEBI:16196     | Oleic acid            | 1.22682875       | 8.0691                | 0.0083                | 0.013617   |
| CHEBI:17306     | Maltose               | 1.10190625       | 27.119                | 1.5233E-4             | 9.1399E-4  |
| CHEBI:16411     | Indole acetic acid    | 1.14572          | 61.15                 | 7.3764E-6             | 8.8516E-5  |
| CHEBI:17992     | Sucrose               | 1.44262875       | 7.8506                | 0.009                 | 0.013617   |
| CHEBI:22599     | DL-Arabinose          | 1.42318875       | 4.8522                | 0.032                 | 0.039514   |
| CHEBI:17351     | Linoleic Acid         | 1.403075         | 11.489                | 0.0028                | 0.0068533  |
| CHEBI:18237     | Glutamic acid         | 1.35306625       | 15.3                  | 0.001                 | 0.002      |
| CHEBI:17634     | D-glucose             | 0.1618825        | 9.065                 | 0.004                 | 0.0062     |

ChEBI ID- Entities of Biological Interest; VIP- Variable Importance in Projection; *f*-value -ratio of two variances; probability value; FDR- false discovery rate.

S7. List of nevirapine degradation products and the biotransformation rule.

| Compound | Chemical name                                                                             | Rule   | Transformation                                                                                                                                                                                                                                                                                 |
|----------|-------------------------------------------------------------------------------------------|--------|------------------------------------------------------------------------------------------------------------------------------------------------------------------------------------------------------------------------------------------------------------------------------------------------|
| 1        | 11-cyclopropyl-4-methyl-5,11-dihydro-6H-dipyrido[3,2-b:2',3'-e] [1,4] diazepin-6-one      | -      | -                                                                                                                                                                                                                                                                                              |
| 2        | 2-((3-amino-4-methylpyridin-2-yl) (cyclopropyl)amino) nicotinate                          | bt0067 | secondary Amide -> Carboxylate + primary Amine<br>Lactam -> Aminecarboxylate                                                                                                                                                                                                                   |
| 3        | 2-((3-amino-5,6-dihydroxy-4-methylpyridin-2-yl) (cyclopropyl)amino) nicotinate            | bt0005 | <i>vic</i> -unsubstituted Aromatic -> <i>vic</i> -Dihydroxyaromatic                                                                                                                                                                                                                            |
| 4        | (E)-2-(N',3-dicarboxylato-N-cyclopropyl-2-iminobutanimidamido) nicotinate                 | bt0254 | <i>vic</i> -unsubstituted Aromatic -> <i>vic</i> -Dihydroxyaromatic                                                                                                                                                                                                                            |
| 5        | 4-(cyclopropyl(methyl)amino)-3-imino-2-methyl-4-oxobutanoate                              | bt0350 | Formamidine -> Amide + Methyl or Amine derivative                                                                                                                                                                                                                                              |
| 6        | 4-(carboxylatoamino)-3-imino-2-methyl-4-oxobutanoate                                      | bt0350 | Formamidine -> Amide + Methyl or Amine derivative                                                                                                                                                                                                                                              |
| 7        | 2-(cyclopropylamino)nicotinate                                                            | bt0350 | Formamidine -> Amide + Methyl or Amine derivative                                                                                                                                                                                                                                              |
| 8        | 4-(cyclopropyl(methyl)amino)-2-methyl-3,4-dioxobutanoate                                  | bt0391 | primary Imine -> Aldehyde<br>cyclic Imine -> Ketone + Amine                                                                                                                                                                                                                                    |
| 9        | methanimine, (R)-2-(5-carboxylato-N-cyclopropyl-4-hydroxy-4-methylpentanamido) nicotinate | bt0241 | tertiary Aliphatic -> tertiary Alcohol                                                                                                                                                                                                                                                         |
| 10       | 2-(3-carboxylato-2-iminobutanamido) nicotinate                                            | bt0243 | N-substituted Amide -> Amide + Aldehyde or Ketone<br>N, N-disubstituted Amide -> N-substituted Amide + Aldehyde or Ketone<br>N-substituted Urea derivative -> Urea derivative + Aldehyde or Ketone<br>N, N-disubstituted Urea derivative -> N-substituted Urea derivative + Aldehyde or Ketone |
| 11       | cyclopropanone                                                                            | bt0243 | N-substituted Amide -> Amide + Aldehyde or Ketone<br>N, N-disubstituted Amide -> N-substituted Amide + Aldehyde or Ketone<br>N-substituted Urea derivative -> Urea derivative + Aldehyde or Ketone<br>N, N-disubstituted Urea derivative -> N-substituted Urea derivative + Aldehyde or Ketone |
| 12       | 4-amino-3-imino-2-methyl-4-oxobutanoate                                                   | bt0318 | Carbamyl -> Amine + Carbonate<br>Carbamate -> Amine                                                                                                                                                                                                                                            |
| 13       | 4-(carboxylatoamino)-2-methyl-3,4-dioxobutanoate                                          | bt0391 | primary Imine -> Aldehyde<br>cyclic Imine -> Ketone + Amine                                                                                                                                                                                                                                    |
| 14       | carboxylatoalaninate                                                                      | bt0067 | secondary Amide -> Carboxylate + primary Amine<br>Lactam -> Aminecarboxylate                                                                                                                                                                                                                   |
| 15       | 4-(carboxylatoamino)-2-hydroxy-3-imino-2-methyl-4-oxobutanoate                            | bt0241 | tertiary Aliphatic -> tertiary Alcohol                                                                                                                                                                                                                                                         |
| 16       | 4-(carboxylatoamino)-2-(hydroxymethyl)-3-imino-4-oxobutanoate                             | bt0333 | aliphatic Methyl [H1] -> primary Alcohol                                                                                                                                                                                                                                                       |
| 17       | 2-(cyclopropylamino)-5,6-dihydroxynicotinate                                              | bt0005 | <i>vic</i> -unsubstituted Aromatic -> <i>vic</i> -Dihydroxyaromatic                                                                                                                                                                                                                            |

## References

1. B. Gao, F. Wang, L. Huang, H. Liu, Y. Zhong and C. Zhang, Biomass, lipid accumulation kinetics, and the transcriptome of heterotrophic oleaginous microalga *Tetrademus bernardii* under different carbon and nitrogen sources, *Biotechnology for Biofuels*, 2021, **14**, 4.
2. J. Wang, X. Zhang, Y. Chen, M. Sommerfeld and Q. Hu, Toxicity assessment of manufactured nanomaterials using the unicellular green alga *Chlamydomonas reinhardtii*, *Chemosphere*, 2008, **73**, 1121-1128.
